# Supplementary material for: Molecular Diagnosis of Koala Retrovirus (KoRV) in South Australian Koalas (Phascolarctos cinereus)
Source: MDPI journal article supplement (doi:10.3390/ani11051477), 2021-05-20
Supplement: s1 [file s1]

Supplementary Materials

# Molecular Diagnosis of Koala Retrovirus (KoRV) in South Australian Koalas (*Phascolarctos cinereus*)

Tamsyn Stephenson <sup>1,\*</sup>, Natasha Speight <sup>1</sup>, Wai Yee Low <sup>2</sup>, Lucy Woolford <sup>1,3</sup>, Rick Tearle <sup>2</sup> and Farhid Hemmatzadeh <sup>1</sup>

**Table S1.** Comparative CT method results for RNA from lymph nodes of koalas that were KoRV positive and KoRV positive diagnosed with lymphoma, using KoRV positive as the control group.

| Sample and Gene | KoRV Gene Average C <sub>T</sub> | ACT-G Average C <sub>T</sub> | $\Delta C_T$ KoRV Gene- ACT-G | $\Delta\Delta C_T$ KoRV Group - $\Delta C_T$ KoRV Positive (Control) | $2^{-\Delta\Delta C_T}$ Fold difference in KoRV Gene Relative to KoRV Negative * Mean (Range) | Z Score | p val |
|-----------------|----------------------------------|------------------------------|-------------------------------|----------------------------------------------------------------------|-----------------------------------------------------------------------------------------------|---------|-------|
| Positive gag 1  | 22.14                            | 20.57                        | 1.57                          | 0.00                                                                 | 1<br>(0.1–7.0)                                                                                |         |       |
| Lymphoma gag 1  | 20.01                            | 20.88                        | −0.87                         | −2.44                                                                | 5.4<br>(0.9–32.2)                                                                             | −1.46   | 0.144 |
| Positive gag 2  | 27.27                            | 20.57                        | 6.70                          | 0.00                                                                 | 1<br>(0.0–27.6)                                                                               |         |       |
| Lymphoma gag 2  | 19.36                            | 20.88                        | −1.52                         | −8.23                                                                | 299<br>(47.7–1880.5)                                                                          | −1.88   | 0.060 |
| Positive pol    | 30.41                            | 20.57                        | 9.84                          | 0.00                                                                 | 1<br>(0.1–15.2)                                                                               |         |       |
| Lymphoma pol    | 21.49                            | 20.88                        | 0.61                          | −9.23                                                                | 602<br>(185.8–1950.2)                                                                         | −2.51   | 0.012 |
| Positive env 1  | 26.04                            | 20.57                        | 5.47                          | 0.00                                                                 | 1<br>(0.1–13.2)                                                                               |         |       |
| Lymphoma env 1  | 18.44                            | 20.88                        | −2.45                         | −7.92                                                                | 242<br>(42.5–1375.6)                                                                          | −2.51   | 0.012 |

\* bold values are significant (Mann-Whitney U test,  $p < 0.05$ ).

**Table S2.** BLASTn analysis results of KoRV termini regions to the koala reference genome. KoRV is represented by the reference genome AF151794. with alignment to the koala reference genome (phaCin\_unsw\_v4.1 Annotation Release 100; GCF\_002099425.1) Adapted from hit table produced from NCBI (blast.ncbi.nlm.nih.gov).

| Scaffold  | Start      | Stop       | Length | Aligned | % Ident |
|-----------|------------|------------|--------|---------|---------|
| scaf00137 | 4,943,695  | 4,944,883  | 1189   | 1178    | 99.07%  |
|           | 4,938,042  | 4,938,853  | 812    | 811     | 99.88%  |
| scaf00005 | 26,678,572 | 26,679,758 | 1187   | 1176    | 99.07%  |
|           | 26,672,908 | 26,673,719 | 812    | 811     | 99.88%  |
| scaf00288 | 726,500    | 727,680    | 1181   | 1172    | 99.24%  |
|           | 732,519    | 733,330    | 812    | 811     | 99.88%  |
| scaf00113 | 3,973,843  | 3,975,031  | 1189   | 1177    | 98.99%  |
|           | 3,968,195  | 3,969,005  | 814    | 806     | 99.02%  |
| scaf00073 | 4,193,643  | 4,194,823  | 1181   | 1171    | 99.15%  |
|           | 4,199,659  | 4,200,470  | 812    | 811     | 99.88%  |
| scaf00357 | 128,022    | 129,200    | 1181   | 1170    | 99.07%  |
|           | 134,041    | 134,852    | 812    | 811     | 99.88%  |
| scaf00253 | 2,925,255  | 2,926,428  | 1181   | 1165    | 98.65%  |
|           | 2,931,284  | 2,932,088  | 805    | 804     | 99.88%  |

**Table S3.** BLASTn analysis results of PhER to the koala reference genome: PhER: phaCin\_unsw\_v4.1. fa.scaf00062:10912078-10920108, as per Lober et al. 2018 [20] and the reference koala genome: phaCin\_unsw\_v4.1 Annotation Release 100; GCF\_002099425.1. Adapted from hit table produced from NCBI (blast.ncbi.nlm.nih.gov).

| Scaffold  | Start      | Stop       | Length | Aligned | % Ident |
|-----------|------------|------------|--------|---------|---------|
| scaf00137 | 4,939,133  | 4,943,711  | 4588   | 4414    | 96.21%  |
|           | 4,945,223  | 4,945,551  | 329    | 314     | 95.44%  |
| scaf00005 | 26,673,999 | 26,678,588 | 4594   | 4415    | 96.10%  |
|           | 26,673,752 | 26,674,080 | 329    | 314     | 95.44%  |
| scaf00288 | 727,670    | 732,238    | 4585   | 4411    | 96.21%  |
|           | 732,157    | 732,486    | 330    | 315     | 95.45%  |
| scaf00113 | 3,969,286  | 3,973,859  | 4586   | 4420    | 96.38%  |
|           | 3,969,038  | 3,969,367  | 330    | 315     | 95.45%  |
| scaf00073 | 4,194,813  | 4,199,379  | 4580   | 4417    | 96.44%  |
|           | 4,199,298  | 4,199,626  | 332    | 315     | 94.88%  |
| scaf00357 | 129,190    | 133,760    | 4583   | 4415    | 96.33%  |
|           | 133,679    | 134,008    | 330    | 315     | 95.45%  |
| scaf00253 | 2,926,418  | 2,931,005  | 4590   | 4418    | 96.25%  |
|           | 2,930,924  | 2,931,251  | 329    | 313     | 95.14%  |
